# Supplementary material for: Genetics and Nutrition Drive the Gut Microbiota Succession and Host-Transcriptome Interactions through the Gilthead Sea Bream (Sparus aurata) Production Cycle
Source: MDPI journal article supplement (doi:10.3390/biology11121744), 2022-11-30
Supplement: s1 [file s1]

**Supplementary Table S4.** Pathway analysis from predicted metagenomes. Values represent the log2 fold change of the comparisons between GS and REF fish in the fish fed CTRL diet at t<sub>0</sub>, t<sub>1</sub>, and t<sub>2</sub>.

| Pathway                                                    | t <sub>0</sub> | t <sub>1</sub> | t <sub>2</sub> |
|------------------------------------------------------------|----------------|----------------|----------------|
| Xylene degradation                                         | 0.57           |                |                |
| Citrate cycle (TCA cycle)                                  | 0.44           |                |                |
| Carbohydrate metabolism                                    | 0.41           |                |                |
| Selenocompound metabolism                                  | 0.41           |                |                |
| C5-Branched dibasic acid metabolism                        | 0.38           | 0.32           |                |
| RNA polymerase                                             | 0.37           |                |                |
| Aminoacyl-tRNA biosynthesis                                | 0.36           |                |                |
| Valine leucine and isoleucine biosynthesis                 | 0.33           | 0.19           |                |
| Cytoskeleton proteins                                      | 0.32           |                |                |
| Cysteine and methionine metabolism                         | 0.27           |                |                |
| Sulfur metabolism                                          | 0.27           |                |                |
| Ribosome                                                   | 0.22           |                |                |
| Peptidases                                                 | 0.16           |                |                |
| One carbon pool by folate                                  | 0.12           |                |                |
| Non-homologous end-joining                                 | -1.44          |                |                |
| Basal transcription factors                                | -5.88          | -5.71          |                |
| Betalain biosynthesis                                      | -6.74          |                |                |
| Indole alkaloid biosynthesis                               | -8.66          |                |                |
| Caffeine metabolism                                        | -12.56         |                |                |
| Clavulanic acid biosynthesis                               | -21.99         | -8.23          |                |
| Vasopressin-regulated water reabsorption                   | -30.00         |                |                |
| Shigellosis                                                |                | 11.07          |                |
| Metabolism of cofactors and vitamins                       |                | 0.20           |                |
| Pantothenate and CoA biosynthesis                          |                | 0.18           |                |
| Galactose metabolism                                       |                | -0.47          |                |
| Primary bile acid biosynthesis                             |                | -1.26          |                |
| Steroid biosynthesis                                       |                | -2.16          |                |
| Other glycan degradation                                   |                | -2.37          |                |
| Glycosaminoglycan degradation                              |                | -3.44          |                |
| RIG-I-like receptor signaling pathway                      |                | -4.49          |                |
| Glycosphingolipid biosynthesis – lacto and neolacto series |                | -7.68          |                |
| Cytochrome P450                                            |                |                | 26.15          |
| Hematopoietic cell lineage                                 |                |                | 26.15          |
