# Supplementary material for: Genetics and Nutrition Drive the Gut Microbiota Succession and Host-Transcriptome Interactions through the Gilthead Sea Bream (Sparus aurata) Production Cycle
Source: MDPI journal article supplement (doi:10.3390/biology11121744), 2022-11-30
Supplement: s1 [file s1]

**Supplementary Table S5.** Sequencing and mapping metrics of the 36 samples included in the RNA-seq analysis.

| Time           | Sample       | Raw reads | Preprocessed reads | Mapped reads | % mapping | % unique mapping |
|----------------|--------------|-----------|--------------------|--------------|-----------|------------------|
| t <sub>1</sub> | GS-CTRL-1    | 44384026  | 43328328           | 40868961     | 94.32     | 74.54            |
| t <sub>1</sub> | GS-CTRL-2    | 38917508  | 37817519           | 35547031     | 94.00     | 74.40            |
| t <sub>1</sub> | GS-CTRL-3    | 48137311  | 46859330           | 44427091     | 94.81     | 75.76            |
| t <sub>1</sub> | GS-CTRL-4    | 32969060  | 31884946           | 29936409     | 93.89     | 73.22            |
| t <sub>1</sub> | GS-CTRL-5    | 25714516  | 24912438           | 23525072     | 94.43     | 74.44            |
| t <sub>1</sub> | GS-CTRL-6    | 34243840  | 33138866           | 31097834     | 93.84     | 73.78            |
| t <sub>1</sub> | GS-CTRL-7    | 27167406  | 26413962           | 24832692     | 94.01     | 74.74            |
| t <sub>1</sub> | GS-CTRL-8    | 33277032  | 32240388           | 30287722     | 93.94     | 74.41            |
| t <sub>1</sub> | GS-CTRL-9    | 52097159  | 50646552           | 47492767     | 93.77     | 73.39            |
| t <sub>1</sub> | GS-FUTURE-1  | 18221552  | 17679966           | 16637016     | 94.10     | 74.91            |
| t <sub>1</sub> | GS-FUTURE-2  | 28777882  | 28050106           | 26010811     | 92.73     | 70.80            |
| t <sub>1</sub> | GS-FUTURE-3  | 28008516  | 27145185           | 25315981     | 93.26     | 71.30            |
| t <sub>1</sub> | GS-FUTURE-4  | 19062050  | 18410554           | 17232664     | 93.60     | 72.78            |
| t <sub>1</sub> | GS-FUTURE-5  | 30761362  | 29731529           | 27785645     | 93.46     | 73.78            |
| t <sub>1</sub> | GS-FUTURE-6  | 24684974  | 23954086           | 22236222     | 92.83     | 69.15            |
| t <sub>1</sub> | GS-FUTURE-7  | 25228022  | 24503474           | 22893785     | 93.43     | 72.00            |
| t <sub>1</sub> | GS-FUTURE-8  | 23072981  | 22357841           | 20533472     | 91.84     | 68.84            |
| t <sub>1</sub> | GS-FUTURE-9  | 19169954  | 18589031           | 17200210     | 92.53     | 70.21            |
| t <sub>1</sub> | REF-CTRL-1   | 29744974  | 28856602           | 27077432     | 93.83     | 73.02            |
| t <sub>1</sub> | REF-CTRL-2   | 33116289  | 32155826           | 30095798     | 93.59     | 72.94            |
| t <sub>1</sub> | REF-CTRL-3   | 37355105  | 36284421           | 34052428     | 93.85     | 72.73            |
| t <sub>1</sub> | REF-CTRL-4   | 20466088  | 19853441           | 18445706     | 92.91     | 70.04            |
| t <sub>1</sub> | REF-CTRL-5   | 18292194  | 17715126           | 16450054     | 92.86     | 70.82            |
| t <sub>1</sub> | REF-CTRL-6   | 22629336  | 21897685           | 20343706     | 92.90     | 71.51            |
| t <sub>1</sub> | REF-CTRL-7   | 23966902  | 23247015           | 21701122     | 93.35     | 72.01            |
| t <sub>1</sub> | REF-CTRL-8   | 25718415  | 24939927           | 23029905     | 92.34     | 70.49            |
| t <sub>1</sub> | REF-CTRL-9   | 21568822  | 20841943           | 19410420     | 93.13     | 71.50            |
| t <sub>1</sub> | REF-FUTURE-1 | 34720535  | 33749501           | 31274136     | 92.67     | 69.36            |
| t <sub>1</sub> | REF-FUTURE-2 | 30260267  | 29329700           | 27347647     | 93.24     | 72.06            |
| t <sub>1</sub> | REF-FUTURE-3 | 20094856  | 19429979           | 18041387     | 92.85     | 71.36            |
| t <sub>1</sub> | REF-FUTURE-4 | 38994107  | 37869344           | 34967434     | 92.34     | 70.33            |
| t <sub>1</sub> | REF-FUTURE-5 | 23434179  | 22698352           | 21161910     | 93.23     | 71.15            |
| t <sub>1</sub> | REF-FUTURE-6 | 19542795  | 18909857           | 17252307     | 91.23     | 67.32            |
| t <sub>1</sub> | REF-FUTURE-7 | 24158701  | 23476852           | 21515827     | 91.65     | 67.87            |
| t <sub>1</sub> | REF-FUTURE-8 | 36074803  | 35052958           | 32401876     | 92.44     | 69.87            |
| t <sub>1</sub> | REF-FUTURE-9 | 35776635  | 34730594           | 31984560     | 92.09     | 69.63            |
