# Supplementary material for: Genetics and Nutrition Drive the Gut Microbiota Succession and Host-Transcriptome Interactions through the Gilthead Sea Bream (Sparus aurata) Production Cycle
Source: MDPI journal article supplement (doi:10.3390/biology11121744), 2022-11-30
Supplement: s1 [file s1]

**Supplementary Table S7.** Comparison between RNA-seq results and real-time PCR validation.

| Gene Name                          | Symbol        | GenBank accession | Fold change<br>(Gs-FUTURE/GS-CTRL) |               |
|------------------------------------|---------------|-------------------|------------------------------------|---------------|
|                                    |               |                   | RNA-seq                            | Real-time PCR |
| Acyl-CoA desaturase                | <i>scd1a</i>  | JQ277703          | -3.06±0.41                         | -4.14±0.27    |
| Cathepsin S                        | <i>ctss</i>   | KM522788          | -2.88±0.31                         | -1.64±0.14    |
| Fatty acid-binding protein, heart  | <i>h-fabp</i> | JQ308834          | 1.24±0.18                          | 1.36±0.09     |
| Hepcidin                           | <i>hamp</i>   | AM749960          | 1.99±0.34                          | 1.85±0.16     |
| Lysophospholipid acyltransferase 3 | <i>lpcat3</i> | JQ277706          | -1.13±0.14                         | -1.26±0.12    |
| Vimentin                           | <i>des</i>    | KF857332          | 2.88±0.42                          | 3.35±0.22     |
