# Supplementary material for: Genetics and Nutrition Drive the Gut Microbiota Succession and Host-Transcriptome Interactions through the Gilthead Sea Bream (Sparus aurata) Production Cycle
Source: MDPI journal article supplement (doi:10.3390/biology11121744), 2022-11-30
Supplement: s1 [file s1]

**Supplementary Table S1.** Table showing the detailed 16S amplicon-based sequencing data obtained in this study, as well as the number of observed OTUs and the species richness estimator (Chao1), obtained for each sample.

| Time           | Sample      | Raw reads | Assigned reads | Observed OTUs | Chao1   |
|----------------|-------------|-----------|----------------|---------------|---------|
| t <sub>0</sub> | GS-1        | 189745    | 87976          | 93            | 444.00  |
| t <sub>0</sub> | GS-2        | 197092    | 120415         | 159           | 200.35  |
| t <sub>0</sub> | GS-3        | 171615    | 148220         | 130           | 283.11  |
| t <sub>0</sub> | GS-4        | 197468    | 149398         | 85            | 320.20  |
| t <sub>0</sub> | GS-5        | 201842    | 87835          | 126           | 1072.00 |
| t <sub>0</sub> | GS-6        | 211897    | 123394         | 97            | 135.75  |
| t <sub>0</sub> | GS-7        | 176647    | 84559          | 93            | 621.00  |
| t <sub>0</sub> | REF-1       | 206016    | 129085         | 177           | 293.37  |
| t <sub>0</sub> | REF-2       | 169041    | 149257         | 179           | 685.67  |
| t <sub>0</sub> | REF-3       | 177883    | 164355         | 158           | 668.00  |
| t <sub>0</sub> | REF-4       | 203385    | 140417         | 326           | 389.98  |
| t <sub>0</sub> | REF-5       | 205011    | 116160         | 334           | 526.60  |
| t <sub>0</sub> | REF-6       | 210377    | 122552         | 154           | 239.56  |
| t <sub>0</sub> | REF-7       | 198386    | 98152          | 219           | 292.75  |
| t <sub>0</sub> | REF-8       | 166924    | 63448          | 146           | 146.00  |
| t <sub>0</sub> | REF-9       | 163096    | 147138         | 121           | 170.79  |
| t <sub>0</sub> | REF-10      | 137690    | 111992         | 138           | 257.25  |
| t <sub>0</sub> | REF-11      | 136923    | 128432         | 176           | 281.12  |
| t <sub>1</sub> | GS-CTRL-1   | 151869    | 84385          | 106           | 571.00  |
| t <sub>1</sub> | GS-CTRL-2   | 221285    | 113975         | 125           | 189.50  |
| t <sub>1</sub> | GS-CTRL-3   | 234025    | 143782         | 140           | 186.87  |
| t <sub>1</sub> | GS-CTRL-4   | 344520    | 260368         | 88            | 103.00  |
| t <sub>1</sub> | GS-CTRL-5   | 237054    | 158885         | 135           | 262.50  |
| t <sub>1</sub> | GS-CTRL-6   | 202678    | 131122         | 91            | 134.15  |
| t <sub>1</sub> | GS-CTRL-7   | 226177    | 147802         | 111           | 134.80  |
| t <sub>1</sub> | GS-CTRL-8   | 225219    | 158125         | 155           | 277.77  |
| t <sub>1</sub> | GS-CTRL-9   | 173038    | 103360         | 87            | 129.00  |
| t <sub>1</sub> | GS-FUTURE-1 | 232407    | 122444         | 110           | 151.35  |
| t <sub>1</sub> | GS-FUTURE-2 | 305488    | 218239         | 130           | 354.00  |
| t <sub>1</sub> | GS-FUTURE-3 | 304096    | 116725         | 164           | 239.25  |
| t <sub>1</sub> | GS-FUTURE-4 | 227412    | 117105         | 99            | 126.00  |
| t <sub>1</sub> | GS-FUTURE-5 | 230786    | 127201         | 112           | 164.00  |
| t <sub>1</sub> | GS-FUTURE-6 | 221545    | 101611         | 115           | 283.00  |
| t <sub>1</sub> | GS-FUTURE-7 | 213915    | 97236          | 100           | 174.38  |
| t <sub>1</sub> | GS-FUTURE-8 | 241840    | 120101         | 118           | 184.00  |
| t <sub>1</sub> | GS-FUTURE-9 | 271655    | 180356         | 106           | 256.27  |
| t <sub>1</sub> | REF-CTRL-1  | 238813    | 139303         | 116           | 157.05  |

|                |              |        |        |     |        |
|----------------|--------------|--------|--------|-----|--------|
| t <sub>1</sub> | REF-CTRL-2   | 264191 | 103815 | 107 | 165.58 |
| t <sub>1</sub> | REF-CTRL-3   | 207281 | 148539 | 88  | 146.67 |
| t <sub>1</sub> | REF-CTRL-4   | 229544 | 189102 | 114 | 213.00 |
| t <sub>1</sub> | REF-CTRL-5   | 270132 | 134059 | 119 | 141.88 |
| t <sub>1</sub> | REF-CTRL-6   | 268118 | 121949 | 146 | 214.06 |
| t <sub>1</sub> | REF-CTRL-7   | 283067 | 142258 | 110 | 162.11 |
| t <sub>1</sub> | REF-CTRL-8   | 229491 | 177570 | 118 | 356.50 |
| t <sub>1</sub> | REF-CTRL-9   | 271959 | 116915 | 135 | 226.07 |
| t <sub>1</sub> | REF-FUTURE-1 | 272537 | 146570 | 120 | 138.50 |
| t <sub>1</sub> | REF-FUTURE-2 | 281251 | 156920 | 114 | 224.00 |
| t <sub>1</sub> | REF-FUTURE-3 | 242337 | 139390 | 117 | 162.32 |
| t <sub>1</sub> | REF-FUTURE-4 | 224019 | 139532 | 123 | 145.55 |
| t <sub>1</sub> | REF-FUTURE-5 | 290759 | 213803 | 92  | 239.00 |
| t <sub>1</sub> | REF-FUTURE-6 | 209210 | 127144 | 98  | 150.50 |
| t <sub>1</sub> | REF-FUTURE-7 | 208318 | 139450 | 84  | 95.00  |
| t <sub>1</sub> | REF-FUTURE-8 | 249769 | 131585 | 149 | 188.06 |
| t <sub>1</sub> | REF-FUTURE-9 | 229040 | 140759 | 107 | 154.14 |
| t <sub>2</sub> | GS-CTRL-1    | 143845 | 98086  | 67  | 154.75 |
| t <sub>2</sub> | GS-CTRL-2    | 88606  | 88570  | 98  | 839.00 |
| t <sub>2</sub> | GS-CTRL-3    | 106961 | 63569  | 100 | 100.00 |
| t <sub>2</sub> | GS-CTRL-4    | 123278 | 90829  | 100 | 272.50 |
| t <sub>2</sub> | GS-CTRL-5    | 82807  | 81900  | 109 | 775.00 |
| t <sub>2</sub> | GS-CTRL-6    | 85141  | 48827  | 45  | 45.00  |
| t <sub>2</sub> | GS-CTRL-7    | 96884  | 93364  | 68  | 69.73  |
| t <sub>2</sub> | GS-CTRL-8    | 123249 | 68836  | 34  | 34.00  |
| t <sub>2</sub> | GS-CTRL-9    | 142899 | 65075  | 56  | 56.00  |
| t <sub>2</sub> | GS-CTRL-10   | 108190 | 96318  | 65  | 104.43 |
| t <sub>2</sub> | GS-FUTURE-1  | 113477 | 75032  | 100 | 841.00 |
| t <sub>2</sub> | GS-FUTURE-2  | 108135 | 48030  | 86  | 86.00  |
| t <sub>2</sub> | GS-FUTURE-3  | 108930 | 68407  | 240 | 240.00 |
| t <sub>2</sub> | GS-FUTURE-4  | 133209 | 124580 | 60  | 118.00 |
| t <sub>2</sub> | GS-FUTURE-5  | 100354 | 64781  | 57  | 57.00  |
| t <sub>2</sub> | GS-FUTURE-6  | 103772 | 92918  | 46  | 131.50 |
| t <sub>2</sub> | GS-FUTURE-7  | 189898 | 116456 | 67  | 109.86 |
| t <sub>2</sub> | GS-FUTURE-8  | 117702 | 110077 | 61  | 62.17  |
| t <sub>2</sub> | GS-FUTURE-9  | 95071  | 60953  | 68  | 68.00  |
| t <sub>2</sub> | GS-FUTURE-10 | 66372  | 63791  | 64  | 64.00  |
| t <sub>2</sub> | REF-CTRL-1   | 82252  | 41917  | 51  | 51.00  |
| t <sub>2</sub> | REF-CTRL-2   | 183541 | 70185  | 109 | 109.00 |
| t <sub>2</sub> | REF-CTRL-3   | 122751 | 46291  | 110 | 110.00 |
| t <sub>2</sub> | REF-CTRL-4   | 245219 | 42352  | 35  | 35.00  |
| t <sub>2</sub> | REF-CTRL-5   | 113616 | 51493  | 44  | 44.00  |

|                |               |        |        |     |        |
|----------------|---------------|--------|--------|-----|--------|
| t <sub>2</sub> | REF-CTRL-6    | 144479 | 56421  | 69  | 69.00  |
| t <sub>2</sub> | REF-CTRL-7    | 86433  | 54025  | 75  | 75.00  |
| t <sub>2</sub> | REF-CTRL-8    | 117657 | 115040 | 71  | 72.24  |
| t <sub>2</sub> | REF-CTRL-9    | 67674  | 45138  | 64  | 64.00  |
| t <sub>2</sub> | REF-CTRL-10   | 179915 | 73368  | 73  | 73.00  |
| t <sub>2</sub> | REF-FUTURE-1  | 261728 | 49036  | 70  | 70.00  |
| t <sub>2</sub> | REF-FUTURE-2  | 97995  | 91842  | 79  | 219.60 |
| t <sub>2</sub> | REF-FUTURE-3  | 98003  | 91231  | 119 | 171.93 |
| t <sub>2</sub> | REF-FUTURE-4  | 78106  | 37566  | 58  | 58.00  |
| t <sub>2</sub> | REF-FUTURE-5  | 159954 | 95713  | 86  | 141.11 |
| t <sub>2</sub> | REF-FUTURE-6  | 282128 | 46723  | 55  | 55.00  |
| t <sub>2</sub> | REF-FUTURE-7  | 265983 | 72620  | 45  | 45.00  |
| t <sub>2</sub> | REF-FUTURE-8  | 115114 | 83535  | 39  | 39.00  |
| t <sub>2</sub> | REF-FUTURE-9  | 65347  | 61902  | 41  | 41.00  |
| t <sub>2</sub> | REF-FUTURE-10 | 91081  | 60342  | 54  | 54.00  |

---
